# Supplementary material for: A general strategy for the in situ construction of CoSe 2 –MSe x @GA (M = Zn, Ni, and Fe) heterostructures for effective sodium storage
Source: Royal Society of Chemistry journal article supplement (doi:10.1039/d4qi01704h), 2024-01-01
Supplement: d4qi01704h1.pdf [file d4qi01704h1.pdf]

## Supporting Information

### **A General Strategy to In Situ Construct $\text{CoSe}_2\text{-MSe}_x\text{@GA}$ ( $\text{M}=\text{Zn, Ni, Fe}$ ) Heterostructures for Effective Sodium Storage**

Zhengzheng Xu,<sup>a</sup> Yanjiao Li,<sup>a</sup> Shiqi Li,<sup>a</sup> Yingying Chen,<sup>\*ab</sup> Majid Farahmandjou,<sup>b</sup> Guoxiu Wang,<sup>b</sup> Hongxun Yang,<sup>\*a</sup> and Hao Tian<sup>\*b</sup>

<sup>a</sup>School of Environmental and Chemical Engineering, Jiangsu University of Science and Technology, Zhenjiang 212003, Jiangsu, China

<sup>b</sup> Centre for Clean Energy Technology, School of Mathematical and Physical Sciences, Faculty of Science, University of Technology Sydney, Broadway, NSW 2007, Australia.

\*Corresponding author.

Email: scyyh@just.edu.cn (Y. Chen); yhongxun@126.com (H. Yang); hao.tian@uts.edu.au (H. Tian)

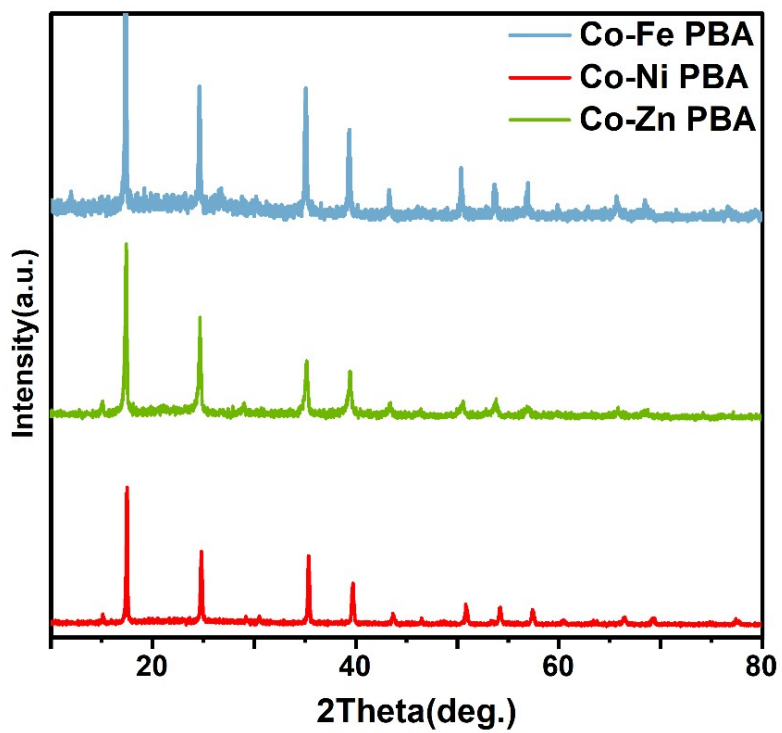

**Figure S1.** XRD patterns of prussian blue analog precursors.

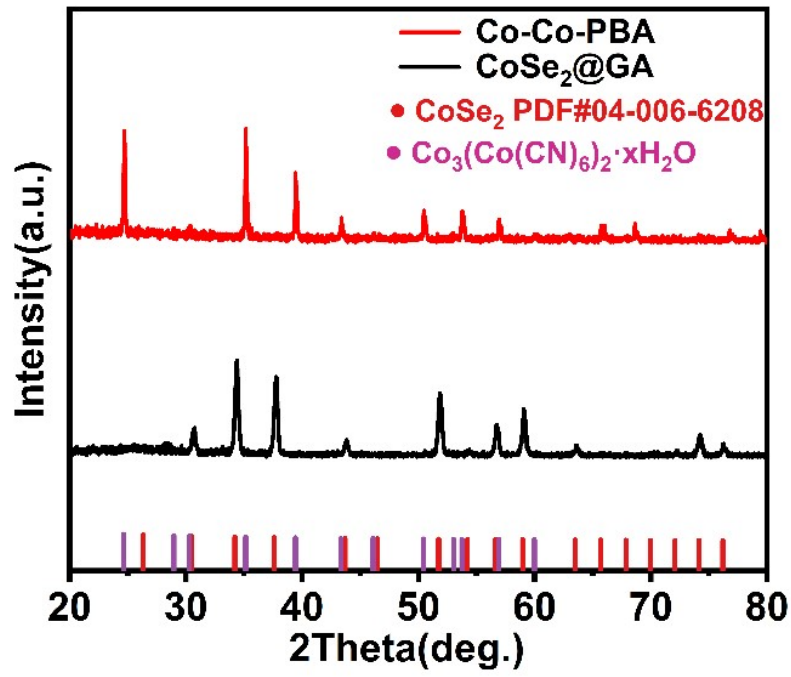

Figure S2. XRD patterns of CoSe<sub>2</sub>@GA.

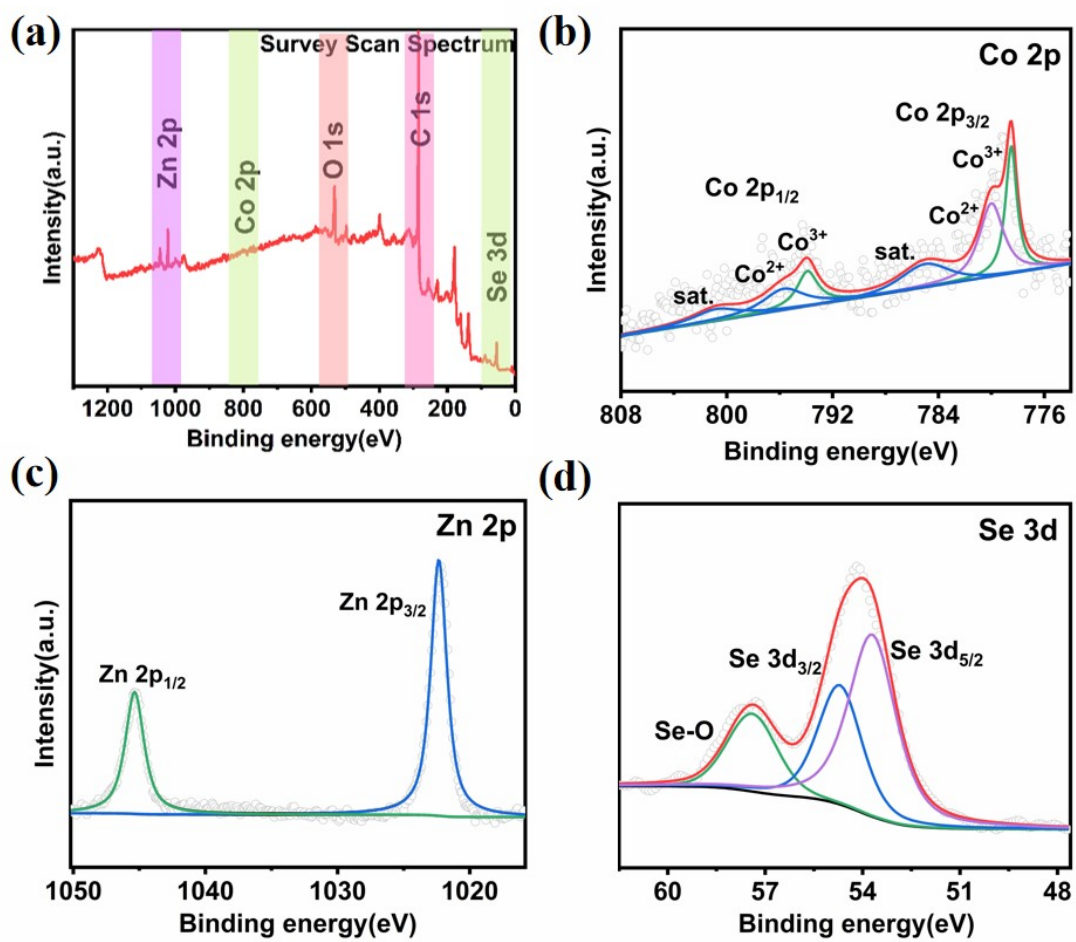

**Figure S3.** (a) XPS survey, (b) Co 2p, (c) Zn 2p and (d) Se 3d spectra of CoSe<sub>2</sub>-ZnSe@GA.

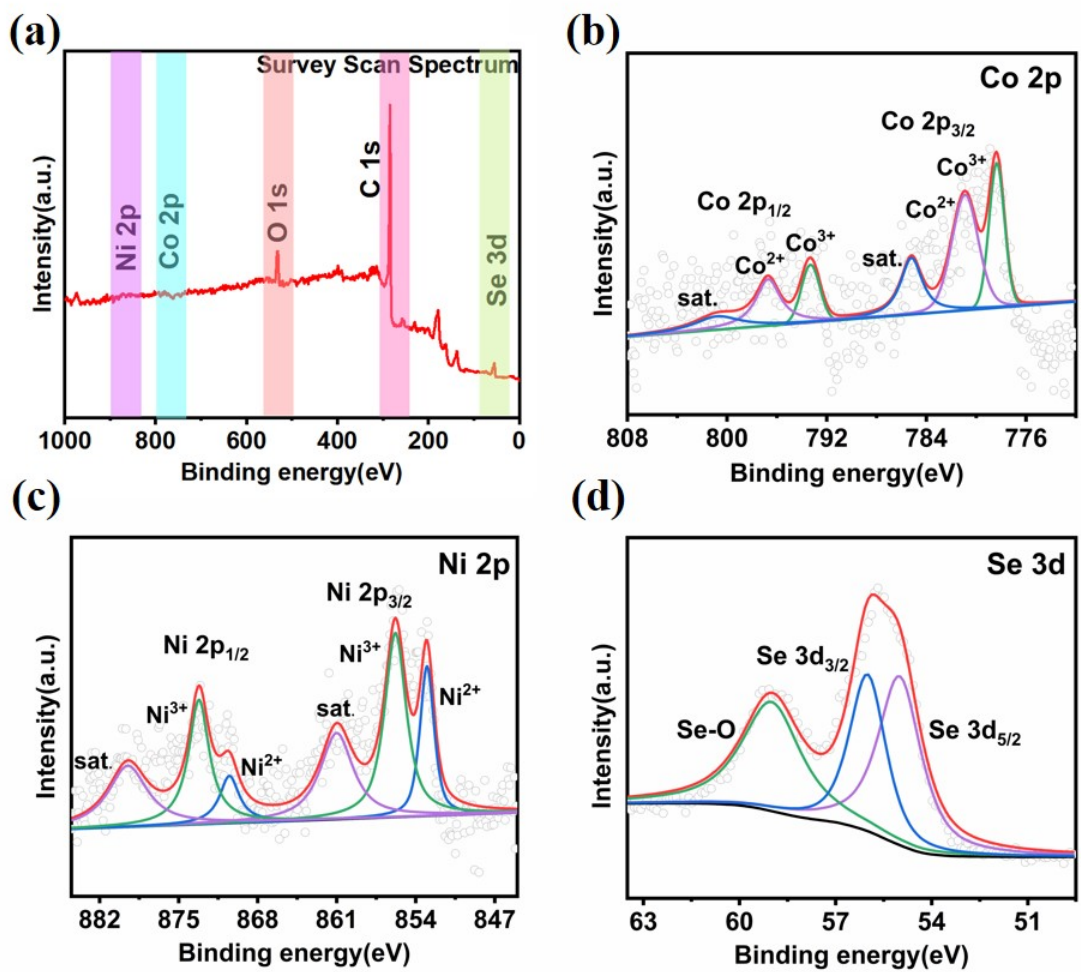

**Figure S4.** (a) XPS survey, (b) Co 2p, (c) Ni 2p and (d) Se 3d spectra of CoSe<sub>2</sub>-NiSe<sub>2</sub>@GA.

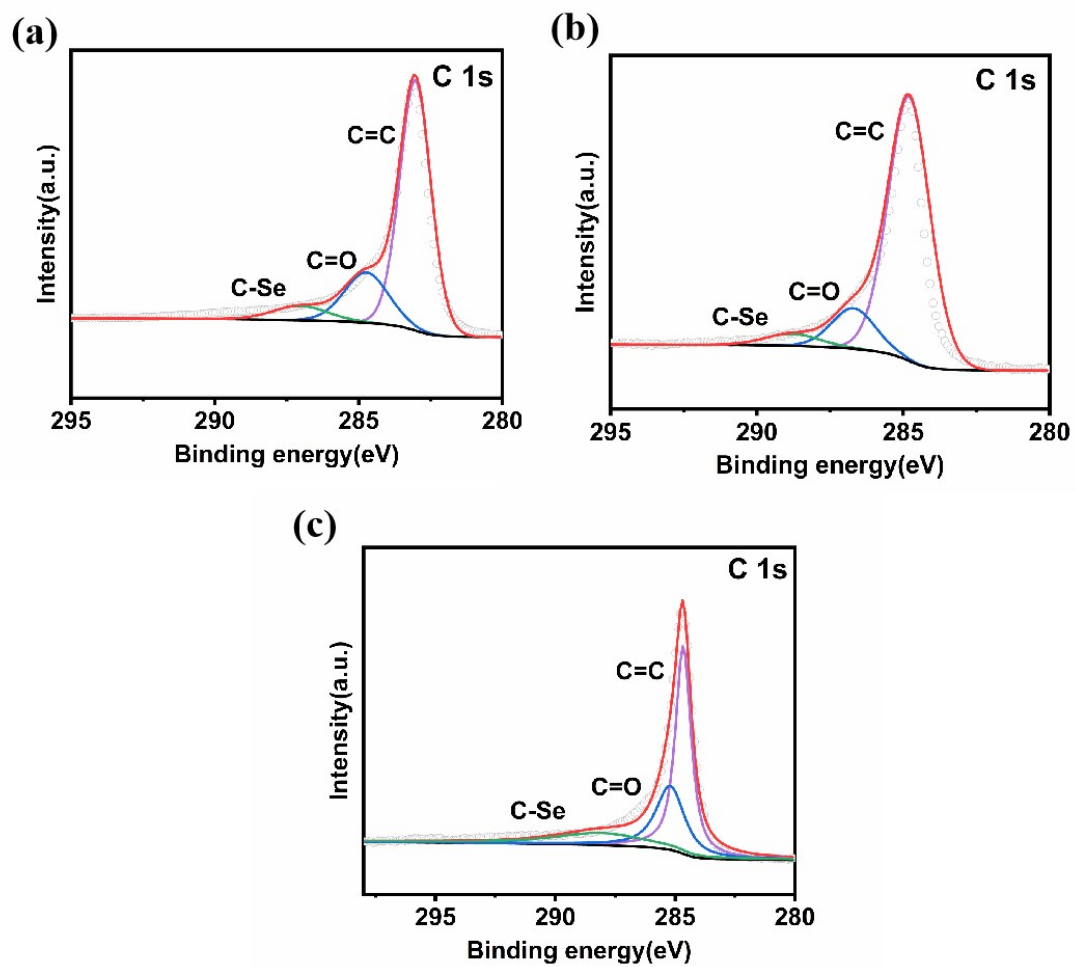

**Figure S5.** C 1s high resolution XPS of (a) CoSe<sub>2</sub>-FeSe@GA, (b) CoSe<sub>2</sub>-ZnSe@GA and (c) CoSe<sub>2</sub>-NiSe<sub>2</sub>@GA.

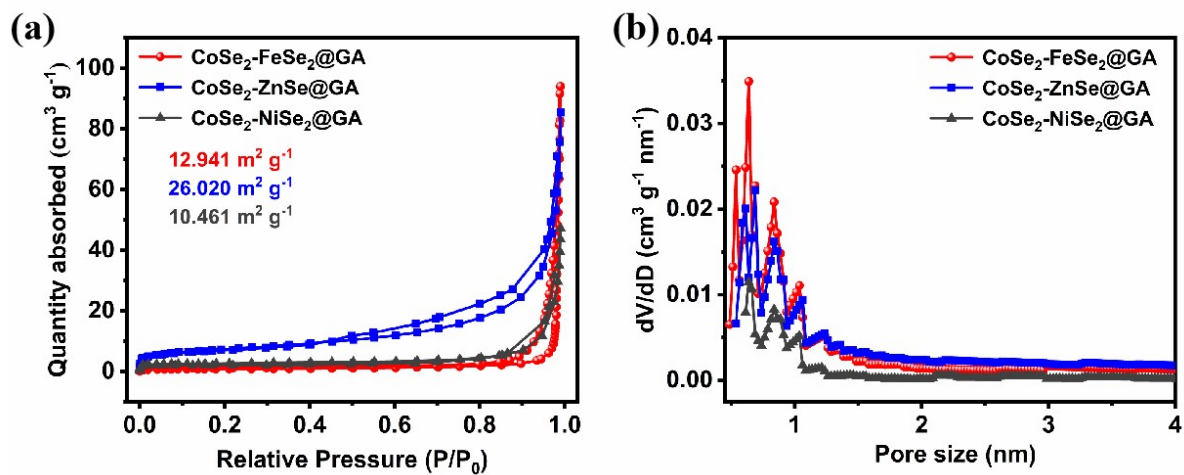

**Figure S6.** N<sub>2</sub> adsorption-desorption isotherms and pore size distribution plots of CoSe<sub>2</sub>-FeSe<sub>2</sub>@GA, CoSe<sub>2</sub>-ZnSe@GA, and CoSe<sub>2</sub>-NiSe<sub>2</sub>@GA.

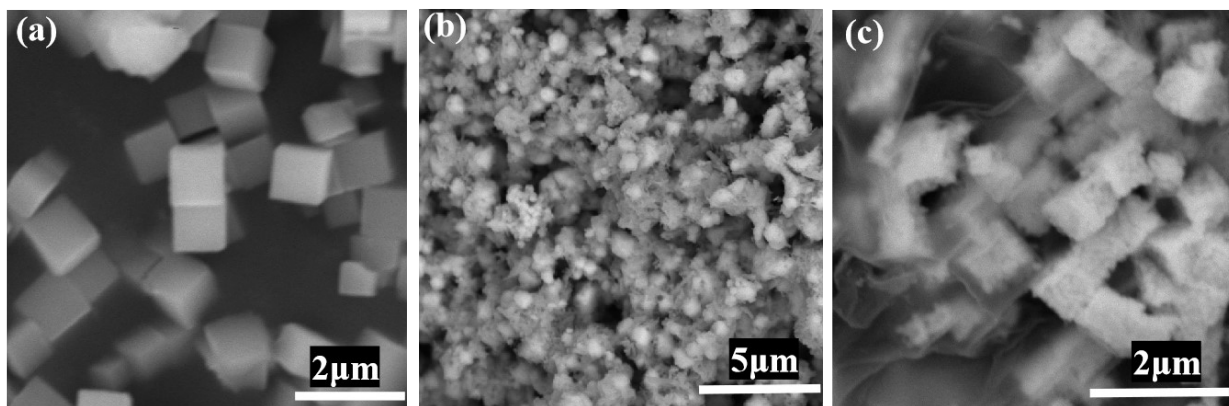

**Figure S7.** SEM images of (a) Co-Co-PBAs, (b) CoSe<sub>2</sub> and (c) CoSe<sub>2</sub>@GA.



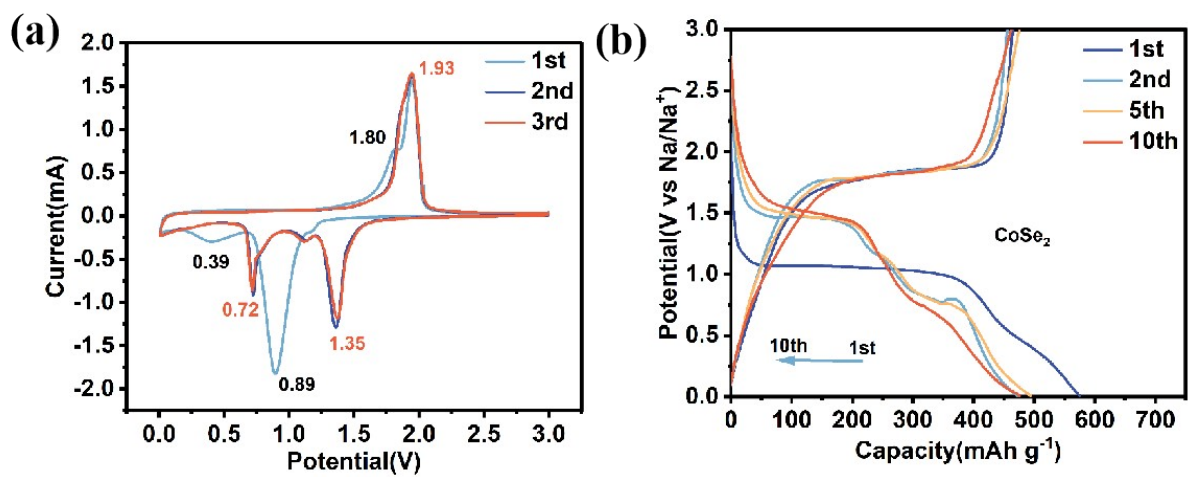

**Figure S8.** (a) CV curves of CoSe<sub>2</sub> at 0.2 mV s<sup>-1</sup>, (b) The charge–discharge profiles of CoSe<sub>2</sub> at 0.2 A g<sup>-1</sup>.

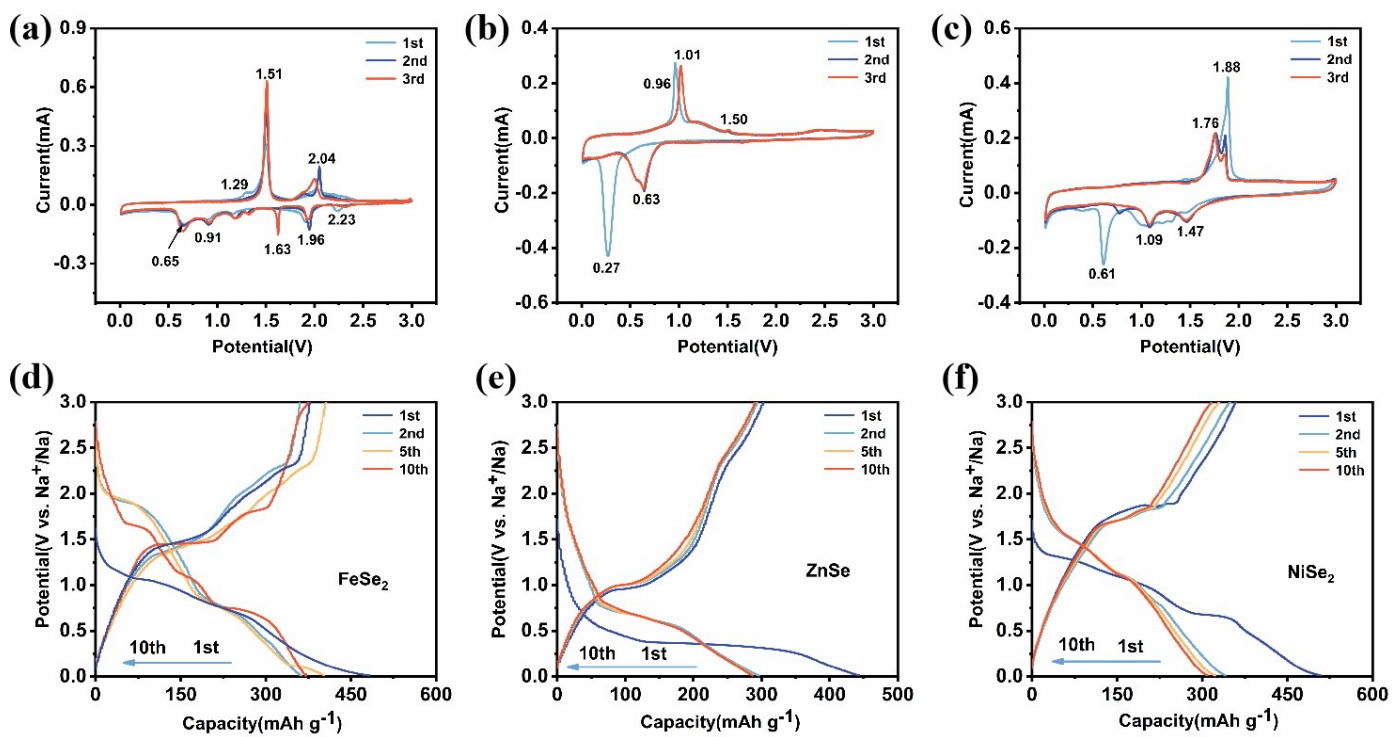

**Figure S9.** CV curves at  $0.2 \text{ mV s}^{-1}$  of (a) FeSe<sub>2</sub>, (b) ZnSe, and (c) NiSe<sub>2</sub>; The charge–discharge profiles of (a) FeSe<sub>2</sub>, (b) ZnSe, and (c) NiSe<sub>2</sub> at the 1<sup>st</sup>, 2<sup>nd</sup>, 5<sup>th</sup> and 10<sup>th</sup> cycle.

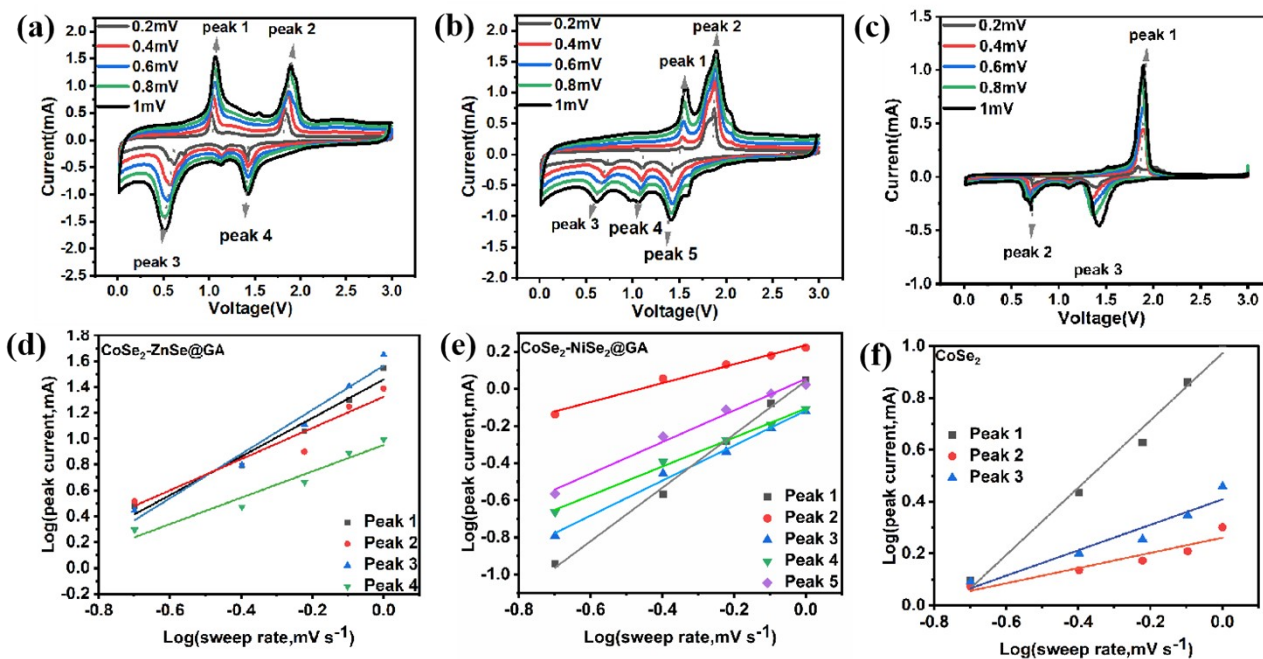

**Figure S10.** CV curves at different scan rates (from 0.2 to 1 mV s<sup>-1</sup>) of (a) CoSe<sub>2</sub>-ZnSe@GA, (b) CoSe<sub>2</sub>-NiSe<sub>2</sub>@GA, (c) CoSe<sub>2</sub>. Log(i) vs log(v) plots of (d) CoSe<sub>2</sub>-ZnSe@GA, (e) CoSe<sub>2</sub>-NiSe<sub>2</sub>@GA and (f) CoSe<sub>2</sub>.

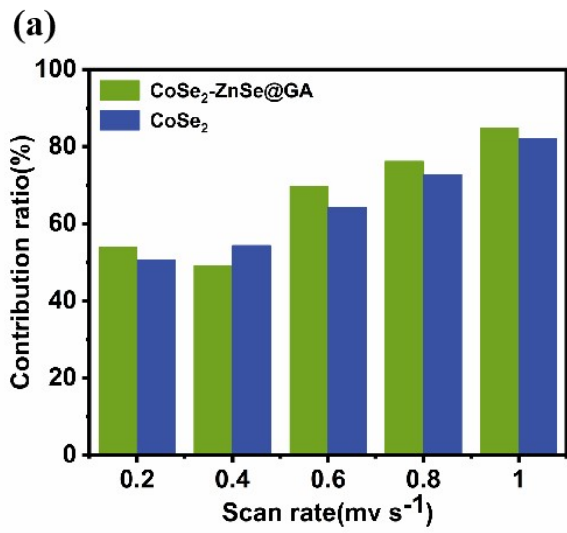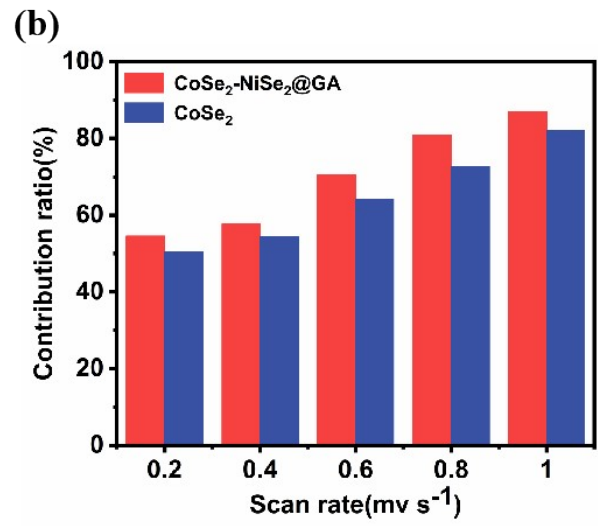

**Figure S11.** Pseudocapacitance contribution rate at different scan rate of (a)  $\text{CoSe}_2\text{-ZnSe@GA}$  and  $\text{CoSe}_2$ , (b)  $\text{CoSe}_2\text{-NiSe}_2\text{@GA}$  and  $\text{CoSe}_2$ .

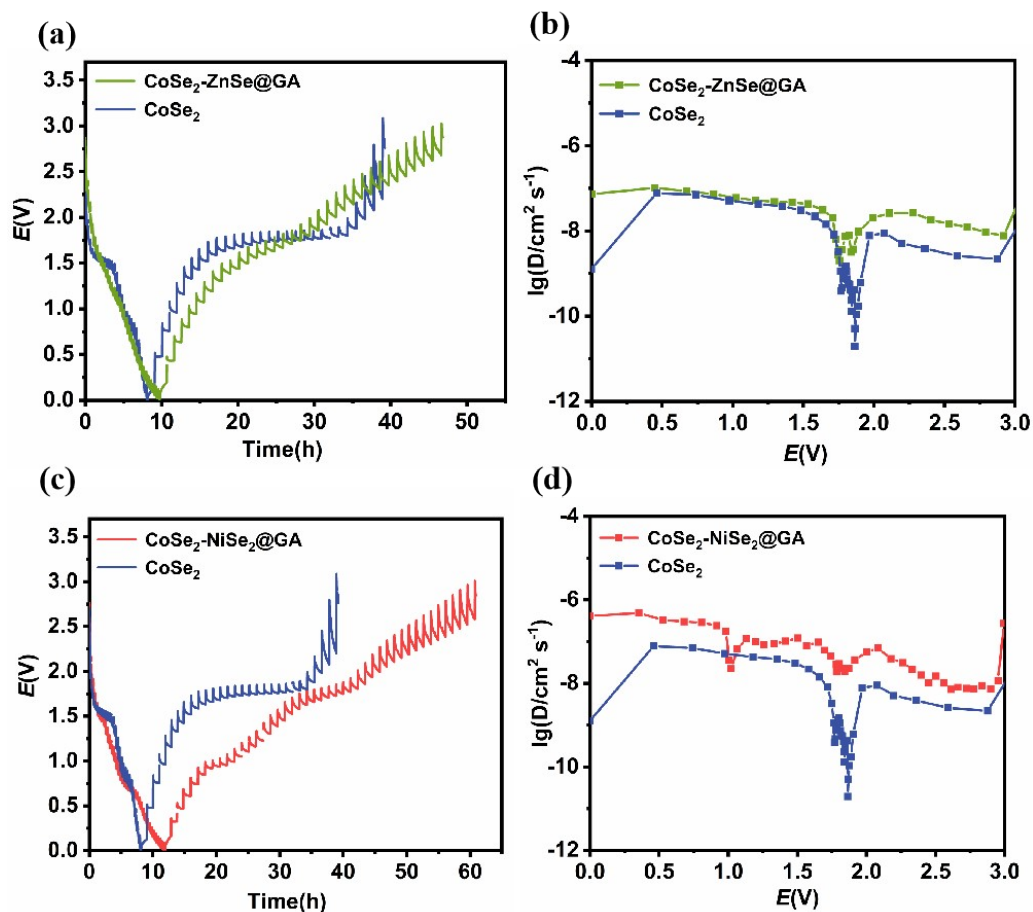

**Figure S12.** (a) GITT voltage curves and (b) Na<sup>+</sup> diffusion coefficients for CoSe<sub>2</sub>-ZnSe@GA and CoSe<sub>2</sub>. (c) GITT voltage curves and (d) Na<sup>+</sup> diffusion coefficients for CoSe<sub>2</sub>-NiSe<sub>2</sub>@GA and CoSe<sub>2</sub>.

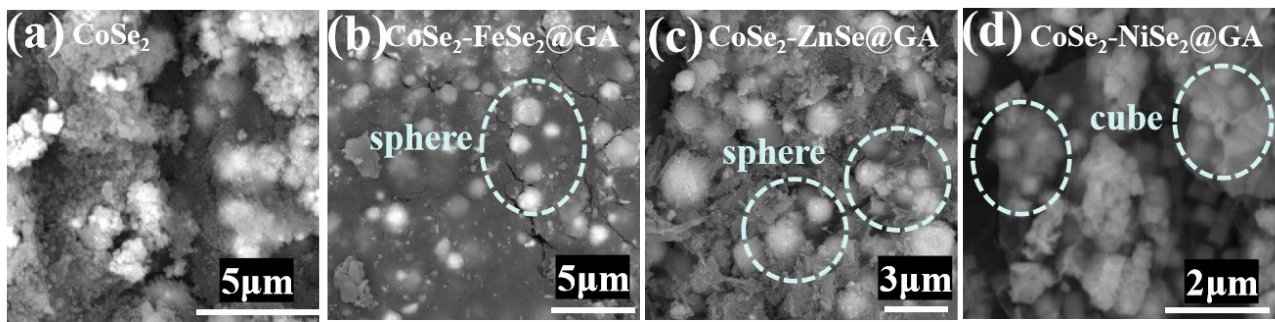

**Figure S13.** SEM images of (a) CoSe<sub>2</sub>, (b) CoSe<sub>2</sub>-FeSe<sub>2</sub>@GA, (c) CoSe<sub>2</sub>-ZnSe@GA and (d) CoSe<sub>2</sub>-NiSe<sub>2</sub>@GA after cycling.

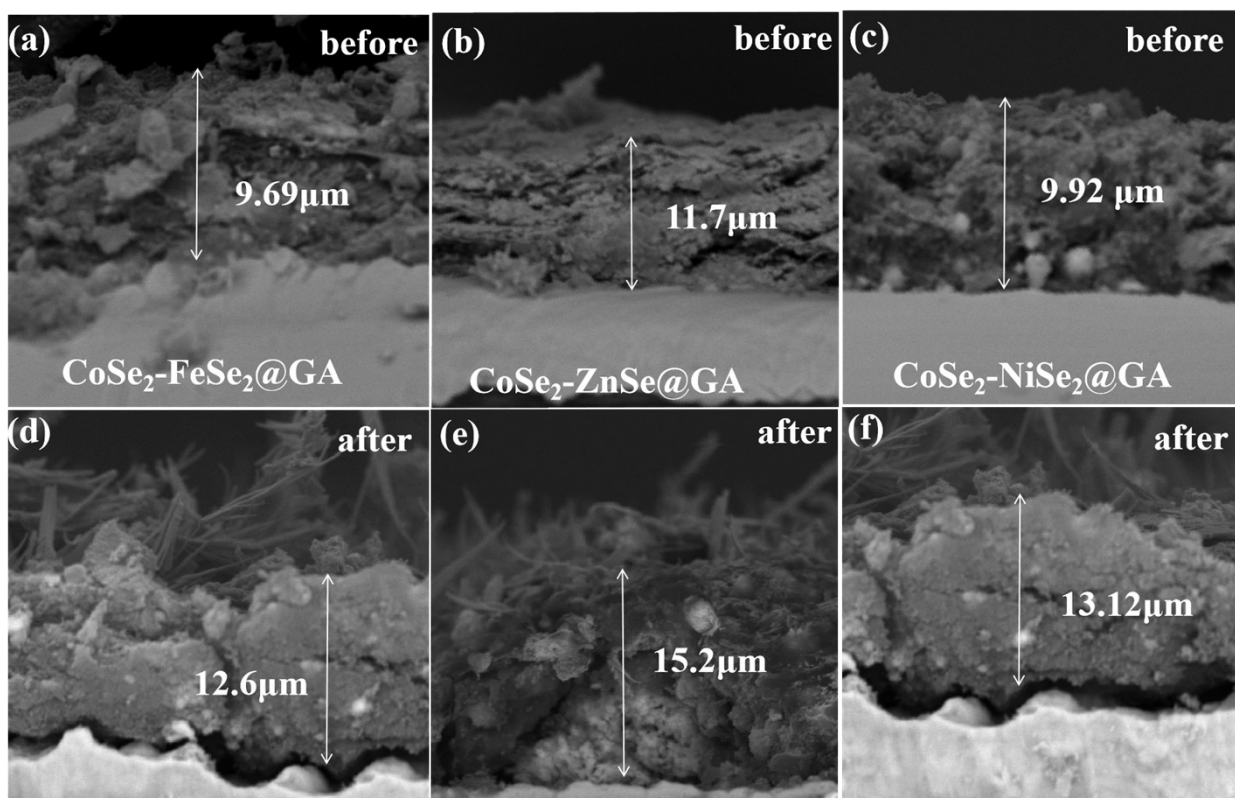

**Figure S14.** SEM images before cycling of (a)  $\text{CoSe}_2\text{-FeSe}_2@GA$ , (b)  $\text{CoSe}_2\text{-ZnSe}@GA$  and (c)  $\text{CoSe}_2\text{-NiSe}_2@GA$ , SEM images after cycling of (d)  $\text{CoSe}_2\text{-FeSe}_2@GA$ , (e)  $\text{CoSe}_2\text{-ZnSe}@GA$  and (f)  $\text{CoSe}_2\text{-NiSe}_2@GA$ .

**Table S1.** Details of comparison of specific surface area and pore characteristics of CoSe<sub>2</sub>-FeSe<sub>2</sub>@GA, CoSe<sub>2</sub>-ZnSe@GA, and CoSe<sub>2</sub>-NiSe<sub>2</sub>@GA

| Samples                                  | S <sub>BET</sub> (m <sup>2</sup> g <sup>-1</sup> ) | V <sub>t</sub> (cm <sup>3</sup> g <sup>-1</sup> ) | V <sub>mic</sub> (cm <sup>3</sup> g <sup>-1</sup> ) | Average pore diameter (nm) | V <sub>meso</sub> (cm <sup>3</sup> g <sup>-1</sup> ) |
|------------------------------------------|----------------------------------------------------|---------------------------------------------------|-----------------------------------------------------|----------------------------|------------------------------------------------------|
| CoSe <sub>2</sub> -FeSe <sub>2</sub> @GA | 12.941                                             | 0.14196                                           | 1.4196                                              | 48.27                      | 1.2546                                               |
| CoSe <sub>2</sub> -ZnSe@GA               | 26.020                                             | 0.1235                                            | 5.9782                                              | 18.98                      | 0.1192                                               |
| CoSe <sub>2</sub> -NiSe <sub>2</sub> @GA | 10.461                                             | 0.068927                                          | 2.4034                                              | 26.357                     | 0.062994                                             |

S<sub>BET</sub>: Specific surface area by BET method, V<sub>t</sub>: Total pore volume, V<sub>mic</sub>: Micropore volume, V<sub>meso</sub>: Mesopore volume.



**Table S2.** Comparison of the electrochemical performance of existing bimetallic selenides reported in recent literatures.

| <b>Materials</b>                                            | <b>Current density (A g<sup>-1</sup>)</b> | <b>Initial Discharge/charge Capacity (mAh g<sup>-1</sup>)</b> | <b>ICE (%)</b> | <b>Reversible Capacity/Cycle number/Current density (mAh g<sup>-1</sup>/cycle/A g<sup>-1</sup>)</b> | <b>Refs.</b>     |
|-------------------------------------------------------------|-------------------------------------------|---------------------------------------------------------------|----------------|-----------------------------------------------------------------------------------------------------|------------------|
| CoSe <sub>2</sub> -FeSe <sub>2</sub> @GA                    | 0.2                                       | 723.0/677.4                                                   | 97.95          | 722.8/1000/1.0                                                                                      |                  |
| CoSe <sub>2</sub> -ZnSe@GA                                  | 0.2                                       | 637.4/532.2                                                   | 83.5           | 649.6/1000/1.0                                                                                      | <b>This work</b> |
| CoSe <sub>2</sub> -NiSe <sub>2</sub> @GA                    | 0.2                                       | 770.9/603.4                                                   | 78.3           | 644.5/1000/1.0                                                                                      |                  |
| ZnSe/CoSe <sub>2</sub> @NPC NTs(II)-700                     | 0.05                                      | 454.8                                                         | 109.1          | 318.4/4000/2.0                                                                                      | 1                |
| Ni <sub>3</sub> Se <sub>4</sub> @CoSe <sub>2</sub> @C/CN Ts | 0.1                                       | 595/324                                                       | 54.5           | 243/600/1.0                                                                                         | 2                |
| ZnSe@CoSe <sub>2</sub> /NC                                  | 0.1                                       | 1071.1/820.9                                                  | 76.6           | 293.3/1000/1.0                                                                                      | 3                |
| CoSe/MoSe <sub>2</sub> -C                                   | 0.2                                       | 532.0/394.4                                                   | 74.14          | 320.9/10000/2.0                                                                                     | 4                |
| (ZnSe@CoSe@CN)                                              | 0.1                                       | 660/559                                                       | 84.6           | 429.6/200/1.0<br>397.1/400/2.0                                                                      | 5                |
| CoSe <sub>2</sub> /ZnSe                                     | 0.1                                       | 575/416                                                       | 72.3           | 386.9/100/0.1                                                                                       | 6                |
| (CoNi)Se <sub>2</sub> /NC                                   | 0.1                                       | 602/492.5                                                     | 81.8           | 450.5/500/1.0                                                                                       | 7                |
| FeSe <sub>2</sub> @CoSe <sub>2</sub> /FeSe <sub>2</sub>     | 0.1                                       | —                                                             | 93             | 542/100/0.2<br>529/1800/2                                                                           | 8                |
| (Co,Fe) Se-NGC@PDA-20                                       | 0.1                                       | 618/376                                                       | 59             | 306/200/1.0                                                                                         | 9                |
| MoSe <sub>2</sub> -Cu <sub>1.82</sub> Se@GA                 | 0.2                                       | 672.4/503.9                                                   | 75.6           | 444.8/1000/1.0                                                                                      | 10               |
| CoSe <sub>2</sub> -SnSe@CNF                                 | 0.1                                       | 798.4/437.8                                                   | 54.8           | 248.7/1000/1.0                                                                                      | 11               |

**Table S3.** Comparison of typical EIS parameters of CoSe<sub>2</sub>-FeSe<sub>2</sub>@GA, CoSe<sub>2</sub>-ZnSe@GA and CoSe<sub>2</sub>-NiSe<sub>2</sub> before and after cycling.

| Samples                                  | R <sub>s</sub> (Ω)<br>(before cycling) | R <sub>ct</sub> (Ω)<br>(before cycling) | R <sub>s</sub> (Ω)<br>(after cycling) | R <sub>ct</sub> (Ω)<br>(after cycling) |
|------------------------------------------|----------------------------------------|-----------------------------------------|---------------------------------------|----------------------------------------|
| CoSe <sub>2</sub> -FeSe <sub>2</sub> @GA | 3.225                                  | 6.1                                     | 3.241                                 | 1.078                                  |
| CoSe <sub>2</sub> -ZnSe@GA               | 2.558                                  | 9.3                                     | 10.71                                 | 3.226                                  |
| CoSe <sub>2</sub> -NiSe <sub>2</sub> @GA | 3.545                                  | 4.0                                     | 3.256                                 | 12.43                                  |

**Table S4.** The calculated b-values of the four materials corresponding to the different peaks

|                                          | Peak 1 | Peak 2 | Peak 3 | Peak 4 | peak 5 |
|------------------------------------------|--------|--------|--------|--------|--------|
| CoSe <sub>2</sub> -FeSe <sub>2</sub> @GA | 0.94   | 0.93   | 0.91   |        |        |
| CoSe <sub>2</sub> -ZnSe@GA               | 0.96   | 0.91   | 0.96   | 0.94   |        |
| CoSe <sub>2</sub> -NiSe <sub>2</sub> @GA | 1.00   | 0.98   | 0.99   | 0.99   | 0.98   |
| CoSe <sub>2</sub>                        | 0.95   | 0.86   | 0.90   |        |        |

**Table S5.** The calculated diffusion coefficients of CoSe<sub>2</sub>-FeSe<sub>2</sub>@GA, CoSe<sub>2</sub>-ZnSe@GA and CoSe<sub>2</sub>-NiSe<sub>2</sub>.

| Samples                                  | D <sub>DisCharge</sub><br>(cm <sup>2</sup> /s × 10 <sup>-9</sup> ) | D <sub>Charge</sub><br>(cm <sup>2</sup> /s × 10 <sup>-9</sup> ) |
|------------------------------------------|--------------------------------------------------------------------|-----------------------------------------------------------------|
| CoSe <sub>2</sub> -FeSe <sub>2</sub> @GA | 20.683                                                             | 15.550                                                          |
| CoSe <sub>2</sub> -ZnSe@GA               | 7.416                                                              | 6.752                                                           |
| CoSe <sub>2</sub> -NiSe <sub>2</sub> @GA | 6.095                                                              | 4.569                                                           |

### Calculation of the relative contents of CoSe<sub>2</sub>, FeSe<sub>2</sub> and carbon in CoSe<sub>2</sub>-FeSe<sub>2</sub>@GA

As shown in Figure 2d, CoSe<sub>2</sub>-FeSe<sub>2</sub>@GA has a weight loss of 70.9wt%. The weight loss of the composite is mainly composed of three parts: the change of weight loss from CoSe<sub>2</sub> to Co<sub>3</sub>O<sub>4</sub>, the change of weight loss from FeSe<sub>2</sub> to Fe<sub>2</sub>O<sub>3</sub> and the loss of carbon oxidation. W represents the weight percentage of FeSe<sub>2</sub>. Since the ratio of cobalt to iron in the raw material is controlled at 1:1 and the molecular weight of FeSe<sub>2</sub> is similar with CoSe<sub>2</sub>, the weight percentage of CoSe<sub>2</sub> is also W and the weight percentage of carbon is (100%-2W). Thus, according to the reaction equation (1)(2), the weight loss from pure CoSe<sub>2</sub> to Co<sub>3</sub>O<sub>4</sub> is 63.0wt% and from pure FeSe<sub>2</sub> to Fe<sub>2</sub>O<sub>3</sub> is 62.6wt%.

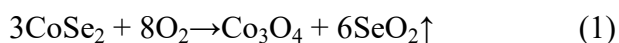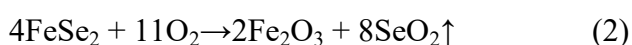

$$W \times 63.0\% + W \times 62.6\% + 100\% - 2W = 70.9\% \quad (3)$$

Therefore, according to formula (3), it can be calculated that the content of CoSe<sub>2</sub>, FeSe<sub>2</sub>, and carbon in CoSe<sub>2</sub>-FeSe<sub>2</sub>@GA is 39.1wt%, 39.1wt%, and 21.8wt%.

### Calculation of the relative contents of CoSe<sub>2</sub>, ZnSe and Carbon in CoSe<sub>2</sub>-ZnSe@GA

As shown in Figure 2d, CoSe<sub>2</sub>-ZnSe@GA has a weight loss of 66.6wt%. The weight loss of the composite is mainly composed of three parts: the weight loss of CoSe<sub>2</sub> to Co<sub>3</sub>O<sub>4</sub>, the weight loss of ZnSe to ZnO and the weight loss of carbon oxidation. W represents the weight percentage of CoSe<sub>2</sub>. Since the ratio of cobalt to zinc in the raw material is controlled at 1:1, the weight percentage of ZnSe is W and the weight percentage of carbon is (100%-2W). Thus, according to reaction equation (4), the weight loss from pure ZnSe to ZnO is 43.6wt%.

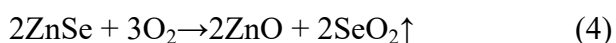

$$W \times 63.0\% + W \times 43.6\% + 100\% - 2W = 66.6\% \quad (5)$$

Therefore, according to formula (5), it can be calculated that the content of CoSe<sub>2</sub>, ZnSe and carbon in CoSe<sub>2</sub>-ZnSe@GA is 35.8wt%, 35.8wt% and 28.4wt%

### Calculation of the relative contents of CoSe<sub>2</sub>, NiSe<sub>2</sub> and carbon in CoSe<sub>2</sub>-NiSe<sub>2</sub>@GA

As shown in Figure 2d, CoSe<sub>2</sub>-NiSe<sub>2</sub>@GA The weight loss is 70.1wt%. The weight loss of composite materials mainly consists of three parts: weight loss from CoSe<sub>2</sub> to Co<sub>3</sub>O<sub>4</sub>, weight loss from NiSe<sub>2</sub> to Ni<sub>2</sub>O<sub>3</sub>, and weight loss from carbon oxidation. W represents the weight percentage of CoSe<sub>2</sub>, and since the cobalt nickel ratio in the raw material is controlled at 1:1.5, the weight percentage of carbon is (100% -2.5 W). Therefore, according to reaction equation (6), the weight loss from pure NiSe<sub>2</sub> to Ni<sub>2</sub>O<sub>3</sub> is 40.0wt%.

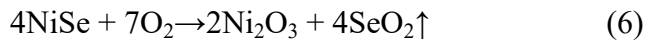

$$W \times 63.0\% + 1.5W \times 40.0\% + 100\% - 2.5W = 70.1\% \quad (7)$$

Therefore, according to formula (7), it can be calculated that the content of  $\text{CoSe}_2$  and  $\text{NiSe}_2$  in  $\text{CoSe}_2$ - $\text{NiSe}_2$ @GA is 23.5wt%, 35.3wt% and the content of carbon is 41.2wt%.

## References:

- [1] Z. N. Cao, J. W. Cui, D. B. Yu, Y. Wang, J. Q. Liu, J. C. Zhang, J. Yan, Y. Zhang, S. H. Sun, Y. C. Wu, Synergistic engineering of architecture and composition in bimetallic selenide@carbon hybrid nanotubes for enhanced lithium- and sodium-ion batteries, *Adv. Funct. Mater.*, 2023, **33**, 2306862.
- [2] H. Y. Zhu, Z. Y. Li, F. Xu, Z. X. Qin, R. Sun, C. H. Wang, S. J. Lu, Y. F. Zhang, H. S. Fan, Ni<sub>3</sub>Se<sub>4</sub>@CoSe<sub>2</sub> hetero-nanocrystals encapsulated into CNT-porous carbon interpenetrating frameworks for high-performance sodium-ion battery, *J. Colloid Interface Sci.*, 2022, **611**, 718-725.
- [3] Z. Zhang, Y. Huang, X. D. Liu, X. Wang, P. B. Liu, Core-shell Co, Zn bimetallic selenide embedded nitrogen-doped carbon polyhedral frameworks assist in sodium-ion battery ultralong cycle, *ACS Sustainable Chem. Eng.*, 2020, **8**, 8381-8390.
- [4] J. H. Li, Y. Y. He, Y. X. Dai, H. Z. Zhang, Y. X. Zhang, S. N. Gu, X. Wang, T. T. Gao, G. W. Zhou, L. Q. Xu, Heterostructure interface construction of cobalt/molybdenum selenides toward ultra-stable sodium-ion half/full batteries, *Adv. Funct. Mater.*, 2024, 2406915.
- [5] Q. Zhang, M. L. Chen, J. Wang, C. F. Zhao, F. H. Cao, H. Li, H. P. Cong, C. L. Zhang, Ultrafine ZnSe/CoSe nanodots encapsulated in core-shell MOF-derived hierarchically porous N-doped carbon nanotubes for superior lithium/sodium storage, *J. Mater. Chem. A*, 2023, **11**, 5056.
- [6] H. Shan, J. Qin, Y. C. Ding, H. M. K. Sari, X. X. Song, W. Liu, Y. C. Hao, J. J. Wang, C. Xie, J. J. Zhang, X. F. Li, Controllable heterojunctions with a semicoherent phase boundary boosting the potassium storage of CoSe<sub>2</sub>/FeSe<sub>2</sub>, *Adv. Mater.*, 2021, **33**, 2102471.
- [7] B. W. Cong, X. R. Li, Y. H. Suo, G. Chen, Metal-organic framework derived bimetallic selenide embedded in nitrogen-doped carbon hierarchical nanosphere for highly reversible sodium-ion storage, *J. Colloid Interface Sci.*, 2023, **635**, 370-378.
- [8] L. Y. Zhang, B. C. Zhu, D. F. Xu, Z. B. Qian, P. Xie, T. Liu, J. G. Yu, Yolk-shell FeSe<sub>2</sub>@CoSe<sub>2</sub>/FeSe<sub>2</sub> heterojunction as anode materials for sodium-ion batteries with high rate capability and stability, *J. Mater. Sci. Technol.*, 2024, **172**, 185-195.
- [9] N. Kitchamsetti, J. S. Cho, C. S. Chakra, Prussian blue analogue derived porous hollow nanocages comprising polydopamine-derived N-doped C coated CoSe<sub>2</sub>/FeSe<sub>2</sub> nanoparticles composited with N-doped graphitic C as an anode for high-rate Na-ion batteries, *Chem. Eng. J.*, 2024, **495**, 153353.
- [10] H. Tian, Z. Z. Xu, K. Liu, D. Wang, L. L. Ren, Y. M. Wei, L. Z. Chen, Y. Y. Chen, S. H. Liu, H. X. Yang, Heterogeneous bimetallic selenides encapsulated within graphene aerogel as advanced anodes for sodium-ion batteries, *J. Colloid Interface Sci.*, 2024, **670**, 152-162.

[11] L. Gao, Y. N. Ma, C. K. Zhang, M. L. Cao, Constructing heterostructured CoSe<sub>2</sub>-SnSe nanoparticles incorporated carbon nanofibers for robust sodium storage, *Chem. Eng. Sci.*, 2024, **283**, 119390.
